# Supplementary material for: An Unbiased Functional Genetics Screen Identifies Rare Activating ERBB4 Mutations
Source: Cancer Res Commun. 2022 Jan 7;2(1):10–27. doi: 10.1158/2767-9764.CRC-21-0021 (PMC9973412; doi:10.1158/2767-9764.CRC-21-0021)
Supplement: Table S1 — Excel sheet listing all the constructs generated to express indicated ERBB mutants. [file crc-21-0021-s01.xlsx]

## Sheet: Sheet1
Plasmid Name	ERBB4 isoform	ERBB mutant	cDNA change	FW Primer	REV Primer	Source plasmid for Mutagenesis	Reference for source Plasmid	Destination vector	Note
pBABEpuro-gateway-ERBB4 Y52C	JM-a CYT-2	Y52C	c.A155G	caagtGctatgaaaactgtgaggt	cgcaaggctcggtactg	pDONR221-ERBB4JM-aCYT-2	-	pBABEpuro-gateway
pBABEpuro-gateway-ERBB4 R124K	JM-a CYT-2	R124K	c.G371A	tacaAaaaagatggaaactt	gtttaaaaatattgccaag		-
pBABEpuro-gateway-ERBB4 R687K	JM-a CYT-2	R687K	c.G2060A	cttgaAaagattcttggaaac	gctcttttctttttgatgc		-
pBABEpuro-gateway-ERBB4 E715K	JM-a CYT-2	E715K	c.G2143A	aaaAaaactgagctgaagag	caaaatacgaagttgagct		-
pBABEpuro-gateway-ERBB4 G741R	JM-a CYT-2	G741R	c.G2221A	ctgaaAgagaaactgtgaag	gtacccaaatacctttataaac		-
pBABEpuro-gateway-ERBB4 G802D	JM-a CYT-2	G802D	c.G2405A	catgActgcctgttggag	gggcataagttgagtaaccag		-
pBABEpuro-gateway-ERBB4 M993I	JM-a CYT-2	M993I	c.G2979A	gtatAaagcttcccagtcc	gatcatcaccctgaataactag		-
pBABEpuro-gateway-ERBB4 V1172F	JM-a CYT-2	V1172F	c.G3466T	cttttTtttctcggagaaaaa	ggttctcctccactggat		-		ERBB4 JM-aCYT-2 V1156F
pBABEpuro-gateway-ERBB4 G1217R	JM-a CYT-2	G1217R	c.G3601C	cttgCgaaaagctgagtacc	gtgttggcaaaggtgttg		-		ERBB4 JM-aCYT-2 G1201R
pBABEpuro-gateway-ERBB4 K1218N	JM-a CYT-2	K1218N	c.A3606C	ggaaaCgctgagtacctgaag	caaggtgttggcaaaggtg		-		ERBB4 JM-aCYT-2 K1202N
pcDNA3.1ERBB4JM-aCYT-2-E715K-V954R-HA	JM-a CYT-2	E715K	c.G2143A	aaaAaaactgagctgaagag	caaaatacgaagttgagct	pcDNA3.1ERBB4JM-aCYT-2-V954R-HA	Kurppa et. al. 2016	-
pcDNA3.1EGFR-K721R-HA	-	EGFR K721R	c.A2233G	gctatcaGggaattaagag	gacgggaattttaactttc	pcDNA3.1EGFR-HA	Merilahti et al. 2017	-
pcDNA3.1ERBB2-K753M-HA	-	ERBB2 K753M	c.AA2258TG	atcaTGgtgttgaggga	ggccactggaattttca	pcDNA3.1ERBB2-HA		-
pMSCV-ERBB4-BGlII-wt-PGK-Puro-IRES-GFP	JM-a CYT-1	No		Commercially ordered from Genscript			-	pMSCV-PGK-Puro-IRES-GFP
pMSCV-ERBB4-BgllI-linkerII-PGK-Puro-IRES-GFP	JM-a CYT-1	No		Commercially ordered from Genscript			-
pMSCV-ERBB4-BgllI-R124K-PGK-Puro-IRES-GFP	JM-a CYT-1	R124K	c.GA371AG	Commercially ordered from Genscript			-
pMSCV-ERBB4-BgllI-R687K-PGK-Puro-IRES-GFP	JM-a CYT-1	R687K	c.GA2060AG	Commercially ordered from Genscript			-
pMSCV-ERBB4_BglII-E715K-PGK-Puro-IRES-GFP	JM-a CYT-1	E715K	c.GAA2143AAG	Commercially ordered from Genscript			-
pMSCV-ERBB4-BgllI-G741R-PGK-Puro-IRES-GFP	JM-a CYT-1	G741R	c.GG2221AG	Commercially ordered from Genscript			-
pMSCV-ERBB4-BgllI-K935I-PGK-Puro-IRES-GFP	JM-a CYT-1	K935I	c.AA2804TC	Commercially ordered from Genscript			-
pMSCV-ERBB4_BglII-E715Kcyt2-PGK-Puro-IRES-GFP	JM-a CYT-2	E715K	c.GAA2143AAG	Commercially ordered from Genscript			-
